# Supplementary material for: Puckered and JNK signaling in pioneer neurons coordinates the motor activity of the Drosophila embryo
Source: PubMed Central journal article supplement (PMC10713690; doi:10.1038/s41467-023-43783-1), 2023-12-11
Supplement: 41467_2023_43783_MOESM1_ESM.pdf [file 41467_2023_43783_MOESM1_ESM.pdf]

1 **Puckered in pioneer neurons coordinates the motor activity of the**  
2 ***Drosophila* embryo**

3

4 **Katerina Karkali<sup>1,3\*</sup>, Samuel W. Vernon<sup>2,4</sup>, Richard A. Baines<sup>2</sup>, George Panayotou<sup>3</sup> and**  
5 **Enrique Martín-Blanco<sup>1\*</sup>**

6 1. Instituto de Biología Molecular de Barcelona (CSIC), Parc Científic de Barcelona, Baldiri  
7 Reixac 10-12, 08028 Barcelona, Spain

8 2. Division of Neuroscience, School of Biological Sciences, Faculty of Biology, Medicine and  
9 Health, University of Manchester, Manchester Academic Health Science Centre, Manchester,  
10 M13 9PL, UK.

11 3. BSRC Alexander Fleming, 34 Fleming Street, 16672 Vari, Greece

12 4. Present address: EPFL SV BMI UPMCCABE, SV 2511, Station 19, VD 1015, Lausanne,  
13 Switzerland.

14 \* Correspondence to: [kkabmc@ibmb.csic.es](mailto:kkabmc@ibmb.csic.es) or [embbmc@ibmb.csic.es](mailto:embbmc@ibmb.csic.es)

15

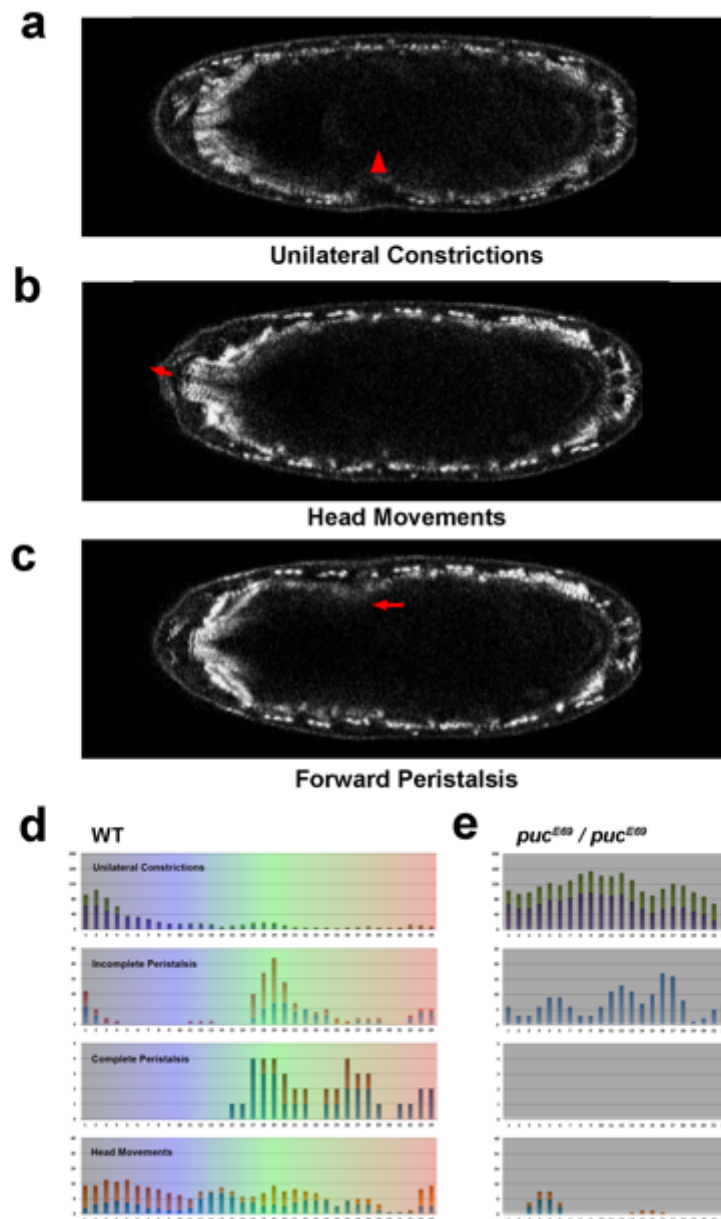

17

18 **Supplementary Figure 1. Types of embryonic muscle movements**

19 Snapshots from Supplementary Movie 1 displaying mid-plane images of a stage 17 embryo  
 20 carrying two GFP protein traps expressed at muscle Z-lines (*w; G203, ZCL2144*). Three main  
 21 types of movement were observed during the muscle coordination process. Red arrows point  
 22 to the contracting muscle units. Anterior is to the left. Scale bar is 50  $\mu$ m. a) Unilateral muscle  
 23 contractions. They can occur at any embryo side and in different segments. b) Head turning  
 24 and mouth hook pinching. c) Peristalsis. They can be incomplete or complete and develop

25 forward (in the image) or backward displacements. d) Histograms showing the progression of  
 26 the muscle coordination process in wild type embryos. Over-imposed colors follow the 5 stages  
 27 of motor coordination maturation described in c. Muscle movements were distributed in four  
 28 classes: Unilateral contractions [sum of the contractions occurring at the right (green) and the  
 29 left (purple) side of the embryo]; Incomplete peristalsis [sum of the incomplete forward (blue)  
 30 and incomplete backward (red) peristaltic attempts]; Complete peristalsis [sum of the full  
 31 forward (blue) and backward (red) peristalsis]; and Head movements [sum of head turning  
 32 (red) and mouth hook pinching events (blue)]. e) Histograms equivalent to d showing the  
 33 unsuccessful muscle coordination of *puc*<sup>E69</sup> embryos.

34

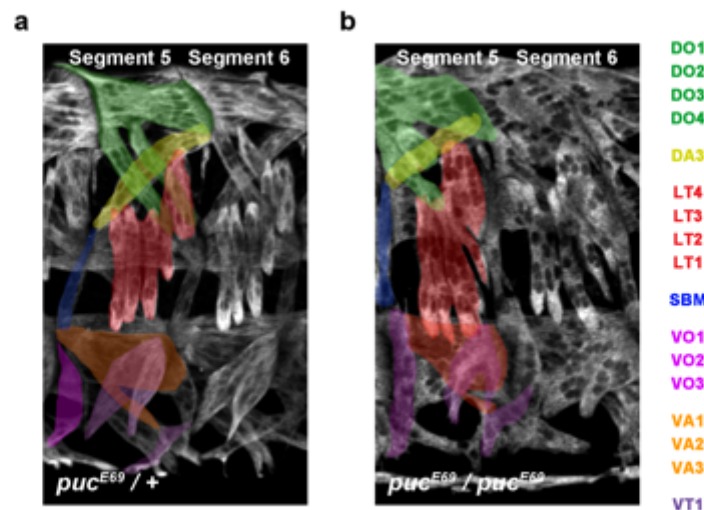

35

36 **Supplementary Figure 2. Muscles integrity is preserved in *puc* mutants**

37 a and b) Representative images of the Myosin expression pattern, highlighting the full set of  
 38 somatic muscles, of stage 17 whole mount wild type (*puc*<sup>E69</sup> / +) (a) and *puc* mutant (*puc*<sup>E69</sup> /  
 39 *puc*<sup>E69</sup>) (b) embryos. The full set of embryonic muscles was traceable in *puc* mutants. Visible  
 40 external muscles were color coded as indicated.

41

42

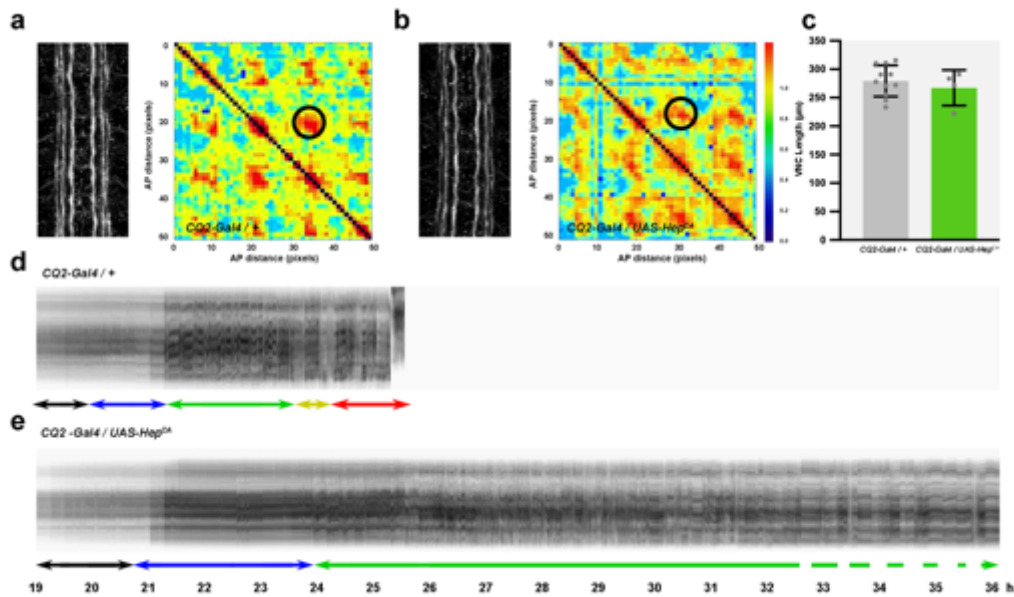

43

44 **Supplementary Figure 3. JNK hyperactivation in U motorneurons does not affect muscles**  
 45 **activities coordination**

46 a and b) Cross-correlation matrices along the AP axis of the VNC of stage 17 embryos stained  
 47 with Fas 2 (CQ2-Gal4 / + controls (n=4) and CQ2-Gal4 / UAS-Hep<sup>CA</sup> (n=3). The color-code  
 48 indicates the correlation level for each possible comparison at each position along the AP axis.  
 49 The structural organization of the axonal network [3D correlation nodes (black ellipses)] was  
 50 largely unaffected by Hep<sup>CA</sup> overexpression in the CQ2 cells (compare a to b). c)  
 51 Quantification of the VNC length in µm (average and standard deviation) for each condition [a  
 52 (n=5) and b (n=3)]. Statistically significant differences in length were not detected (p=0.4743).  
 53 d and e) Representative kymographs displaying muscle activity profiles from 19 to 36 hours  
 54 AEL of embryos not-expressing (n= 2) (d) or expressing (n= 8) (e) Hep<sup>CA</sup> in CQ2 motoneurons.  
 55 The different stages of muscles activities are color coded as in Figure 1. While in the absence  
 56 of Hep<sup>CA</sup> a normal pattern of muscle coordination takes place, the overexpression of Hep<sup>CA</sup> in  
 57 CQ2 cells arrested the embryos at stage C, showing continuous backward and forward  
 58 complete peristalsis.

59

60

61

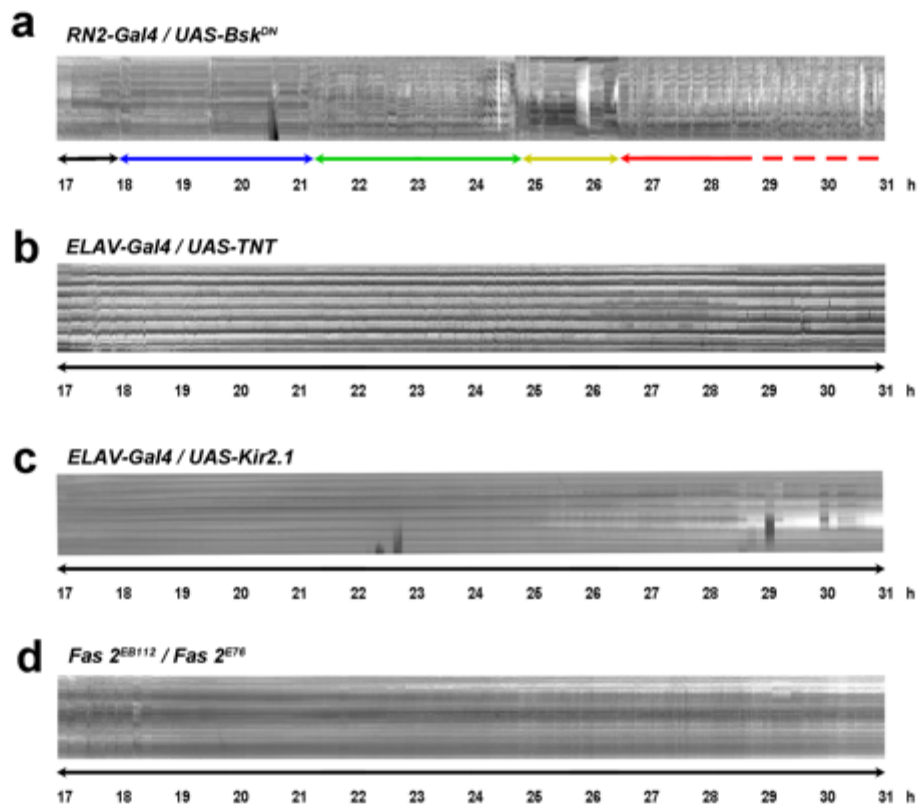

62

63 **Supplementary Figure 4. Muscle coordination is not affected by a reduction of JNK**  
 64 **activity in RN2 cells but abolished by interfering in neurotransmitter exocytosis, neuronal**  
 65 **polarity or Fas 2 expression**

66 a to d) Representative kymographs displaying muscle activity profiles from 17 to 31 hours  
 67 AEL of embryos -expressing *Bsk<sup>DN</sup>* in RN2 neurons (n= 4) (a), TNT pan-neurally in ELAV  
 68 neurons (n= 2) (b), Kir2.1 pan-neurally in ELAV neurons (n= 2) (c) and in an heteroallelic Fas  
 69 2 condition (*Fas 2<sup>EB112</sup> / Fas 2<sup>E76</sup>*) (n=2) (d). The different stages of muscles activities are color  
 70 coded as in Figure 1. The overexpression of *Bsk<sup>DN</sup>* in RN2 cells did not affect muscles  
 71 coordination but resulted in a failure of hatching completion. Conversely, the pan-neural  
 72 overexpression of TNT or Kir2.1 fully blocked all coordination steps and the embryos remain  
 73 in an abortive stage A, with limited spontaneous twitches. The same was observed in Fas 2  
 74 mutant conditions.

75

76

77

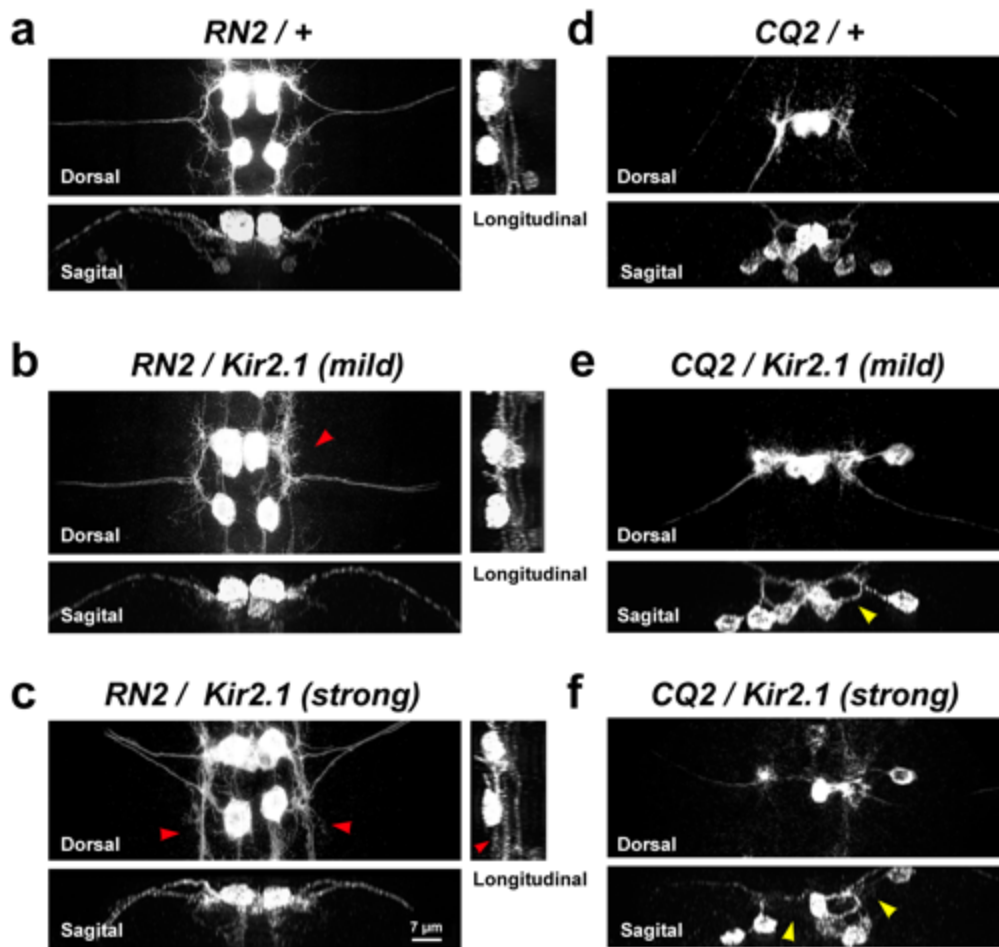

78

79 **Supplementary Figure 5. Axonal and dendritic landscape of pioneer neurons is altered**  
 80 **upon Kir2.1 overexpression**

81 a to f) Single segments (dorsal, sagittal and longitudinal (for RN2) views of stage 17 embryos  
 82 expressing mCD8-GFP (RN2 n=8 and CQ2 n=7) (a and d) and mCD8-GFP and Kir2.1(RN2  
 83 n=15 and CQ2 n=11) (b, c, e and f) under the control of the RN2-Gal4 (a to c) and CQ2-Gal4  
 84 (d to f) lines monitored live. b and c, and e and f, show, respectively mild and strong phenotypic  
 85 defects for each condition. Expressivity was variable but penetrance was superior to 80% for  
 86 both Gal4 lines. Red arrowheads point to altered dendritic arborization pattern in RN2 cells  
 87 expressing Kir2.1. Yellow arrowheads point to positions void of labelling in CQ2 cells  
 88 expressing Kir2.1. Anterior is up (dorsal and longitudinal views). Scale bar is 7 µm.

89

90

91

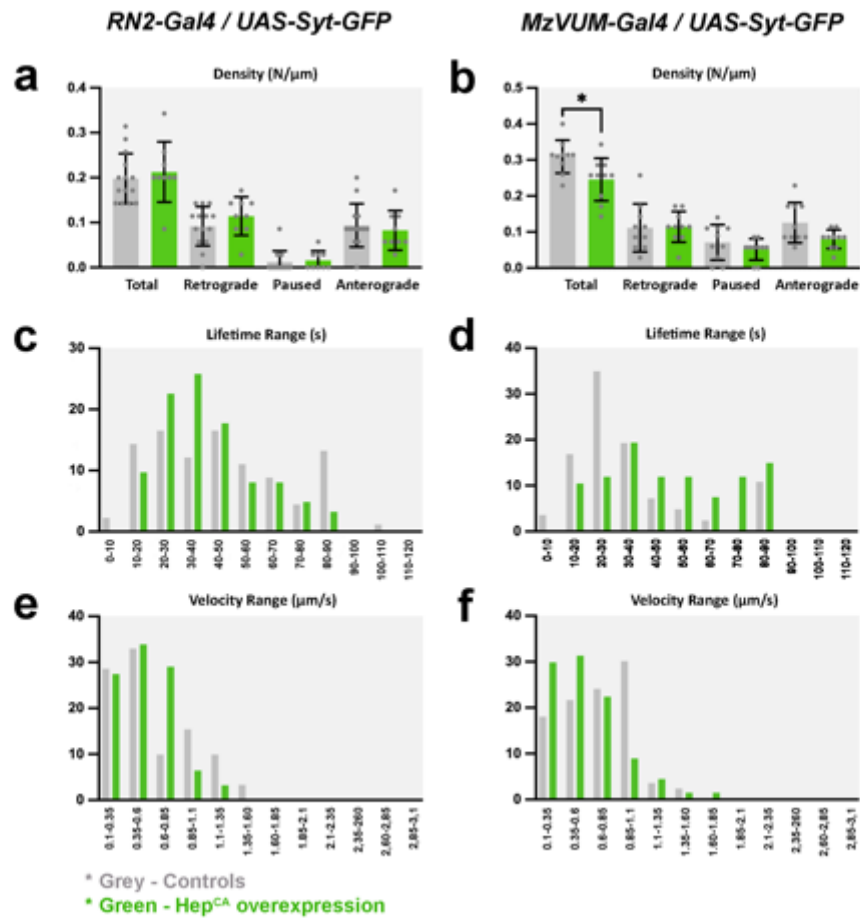

92

93 **Supplementary Figure 6. Synaptotagmin transport is unaffected by JNK hyper-**  
 94 **activation in aCC/RP2 and VUM motoneurons**

95 a and b) Histograms showing synaptotagmin vesicles density and directional motility in control  
 96 (grey) versus Hep<sup>CA</sup> expressing (green) aCC/ RP2 (a) and VUM motoneurons (b). (n=9 for  
 97 RN2 controls, n=9 for RN2 experimental, n=10 for MzVum controls and n=10 for MzVum  
 98 experimental). Only a slight decrease in total numbers was observed for MzVum between  
 99 control and JNK over-active neurons (p=0.0194). No significant differences were observed for  
 100 the rest of the conditions (RN2 total (p=0.9073), RN2 retrograde (p=0.6821), RN2 paused  
 101 (p=0.9995), RN2 anterograde (p=0.9623), CQ2 retrograde (p=0.9999), CQ2 paused  
 102 (p=0.8435) and CQ2 anterograde (p=0.1471). c and d) Lifetime range distribution of motile  
 103 synaptotagmin vesicles in aCC/RP2 (c) and VUM (d) motoneurons. No differences were  
 104 observed in lifetime between control (grey) and Hep<sup>CA</sup> expressing (green) embryos.  
 105 Mean velocity range distribution comparison of motile synaptotagmin vesicles in aCC/RP2 (e)  
 106 and VUM (f) motoneurons between control (grey) and JNK gain-of function (green)  
 107 conditions. For both sets of motoneurons the distribution was unaltered.
